# Supplementary material for: Characterization of TRPA channels in the starfish Patiria pectinifera: involvement of thermally activated TRPA1 in thermotaxis in marine planktonic larvae
Source: PubMed Central journal article supplement (PMC5438368; doi:10.1038/s41598-017-02171-8), 2017-05-19
Supplement: 41598_2017_2171_MOESM1_ESM.pdf [file 41598_2017_2171_MOESM1_ESM.pdf]

## Supplementary information

### **Characterization of TRPA channels in the starfish *Patiria pectinifera*: involvement of thermally activated TRPA1 in thermotaxis in marine planktonic larvae**

Shigeru Saito<sup>1, 2‡</sup>, Gen Hamanaka<sup>3‡</sup>, Narudo Kawai<sup>4</sup>, Ryohei Furukawa<sup>5</sup>, Jun Gojobori<sup>6</sup>,  
Makoto Tominaga<sup>1, 2</sup>, Hiroyuki Kaneko<sup>4\*</sup>, and Yoko Satta<sup>6\*</sup>

## Supplementary table

**Supplementary Table 1.** The list of accession numbers of genes used for profile construction in hmmer.

|              |              |
|--------------|--------------|
| ADG84993     | XP_001493514 |
| ADG84994     | XP_001926150 |
| AAP76197     | XP_581588    |
| XP_001843992 | AEL30802     |
| ACC86138     | AEL30803     |
| EFA01253     | XP_003408268 |
| XP_001944501 | XP_001378427 |
| XP_002121983 | XP_003205160 |
| NP_997491    | XP_418294    |
| EDL14332     | XP_002197858 |
| XP_003509521 | ADD82928     |
| NP_001185699 | ADD82932     |
| EHB06406     | ADD82929     |
| XP_001083172 | ADD82930     |
| EHH64231     | XP_003219691 |
| XP_519806    | NP_001121434 |
| NP_015628    | CBN81913     |
| XP_002819221 | XP_003443514 |
| XP_003274822 | ACI26673     |
| XP_002759054 | CAM46983     |
| XP_544123    | XP_002741542 |
| XP_002922845 | XP_003388069 |

**Supplementary Table 2.** List of genes used in a tree of Figure 3

| Sequence name appears<br>in the tree | species                        | Accession<br>number |
|--------------------------------------|--------------------------------|---------------------|
| Giant panda                          | <i>Ailuropoda melanoleuca</i>  | XP_002922845        |
| African malaria mosquito             | <i>Anopheles gambiae</i>       | ACC86138            |
| C_briggsae                           | <i>Caenorhabditis briggsae</i> | CAP26216            |
| C_elegans                            | <i>Caenorhabditis elegans</i>  | NP_502249.3         |
| Marmoset                             | <i>Callithrix jacchus</i>      | XP_002759054        |
| Dog                                  | <i>Canis lupus familiaris</i>  | XP_544123           |
| Bat                                  | <i>Carollia brevicauda</i>     | AEL30802.1          |
| Guinea pig                           | <i>Cavia porcellus</i>         | NP_001185699        |
| Sea squirt                           | <i>Ciona intestinalis</i>      | XP_002121983        |
| Boa                                  | <i>Corallus hortulanus</i>     | ADD82932            |
| Rattlesnake                          | <i>Crotalus atrox</i>          | ADD82930            |
| Southern house mosquito              | <i>Culex quinquefasciatus</i>  | XP_001843992        |
| Fruit fly_painless                   | <i>Drosophila melanogaster</i> | NP_611979           |
| Fruit fly_pyrexia                    | <i>Drosophila melanogaster</i> | NP_612015           |
| Fruit fly_water_witch                | <i>Drosophila melanogaster</i> | NP_731193           |
| Fruit fly_TRPA1                      | <i>Drosophila melanogaster</i> | NP_648263           |
| Zebrafish1a                          | <i>Danio rerio</i>             | XP_009296845        |
| Zebrafish1b                          | <i>Danio rerio</i>             | XP_009295606        |
| Vampire bat                          | <i>Desmodus rotundus</i>       | AEL30803            |
| Seabass                              | <i>Dicentrarchus labrax</i>    | CBN81913            |
| D_mojavensis                         | <i>Drosophila mojavensis</i>   | XP_002007415        |
| D_virillis                           | <i>Drosophila virilis</i>      | ADG84994            |
| Horse                                | <i>Equus caballus</i>          | XP_001493514        |
| Chicken                              | <i>Gallus gallus</i>           | BAO51998            |
| Naked mole-rat                       | <i>Heterocephalus glaber</i>   | EHB06406            |
| Human                                | <i>Homo sapiens</i>            | NP_015628           |
| Elephant                             | <i>Loxodonta africana</i>      | XP_003408268        |
| Crab-eating macaque                  | <i>Macaca fascicularis</i>     | EHH64231            |
| Rhesus monkey                        | <i>Macaca mulatta</i>          | XP_005563579        |
| Opossum                              | <i>Monodelphis domestica</i>   | XP_001378427        |

|                      |                                    |                |
|----------------------|------------------------------------|----------------|
| Mouse                | Mus musculus                       | NP_808449      |
| Sea anemone1         | Nematostella vectensis             | XP_001625280.1 |
| Sea anemone2         | Nematostella vectensis             | XP_001630764.1 |
| Sea anemone3         | Nematostella vectensis             | XP_001631352.1 |
| Sea anemone4         | Nematostella vectensis             | XP_001633166.1 |
| Sea anemone5         | Nematostella vectensis             | XP_001639740.1 |
| Sea anemone6         | Nematostella vectensis             | XP_001641230.1 |
| Sea anemone7         | Nematostella vectensis             | XP_001619454.1 |
| Gibbon               | Nomascus leucogenys                | XP_003274822.1 |
| Nile tilapia         | Oreochromis niloticus              | XP_003443514   |
| Chimpanzee           | Pan troglodytes                    | XP_519806      |
| Rat snake            | Pantherophis obsoletus lindheimeri | ADD82929       |
| Orangutan            | Pongo abelii                       | XP_002819221   |
| Python               | Python regius                      | ADD82928       |
| Rat                  | Rattus norvegicus                  | NP_997491      |
| Pig                  | Sus scrofa                         | XP_006825038   |
| Zebra finch          | Taeniopygia guttata                | XP_013852128   |
| Torafugu             | Takifugu rubripes                  | XP_002197858   |
| Red flour beetle     | Tribolium castaneum                | EFA01253       |
| Tropical clawed frog | Xenopus tropicalis                 | NP_001121434   |



## Supplementary figure

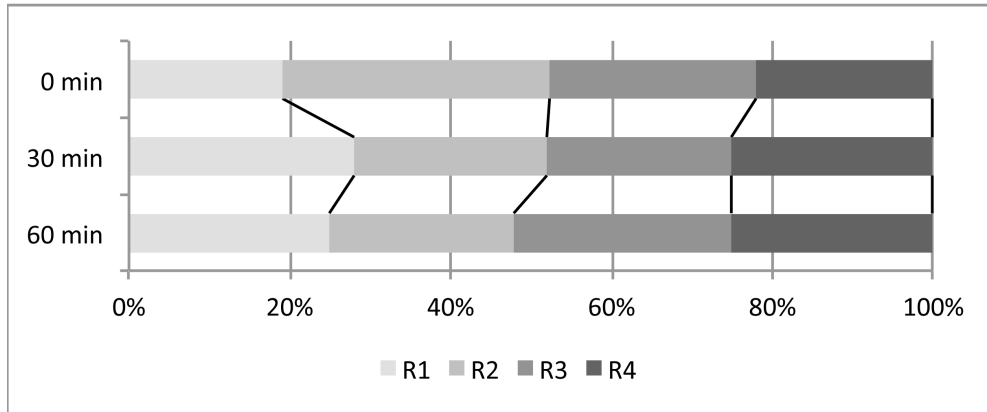

**Supplementary Fig. S1. Thermotactic behavior of starfish larvae at constant temperature.** Approximately 50 larvae were added to a chamber, and the number of larvae was counted as in the same way as in Fig. 2. The proportions of the number of larvae in each area remained relatively constant over time ( $n = 3$ ).

### *PpTRPA1* sense probe

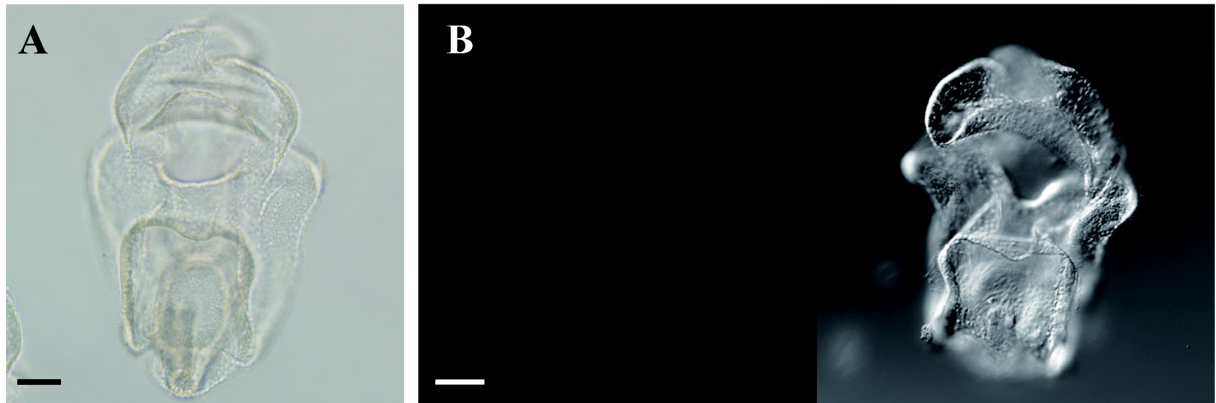

**Supplementary Fig. S2. Whole mount in situ hybridization (control experiment for examination of *PpTRPA1* expression).** (A-C) A sense probe for *PpTRPA1* was used instead of an antisense one. 4-days-old bipinnaria larvae were used and the arrangement of the panels is the same as those in Fig. 4. No signal was seen. Scale bar, 50  $\mu\text{m}$ .

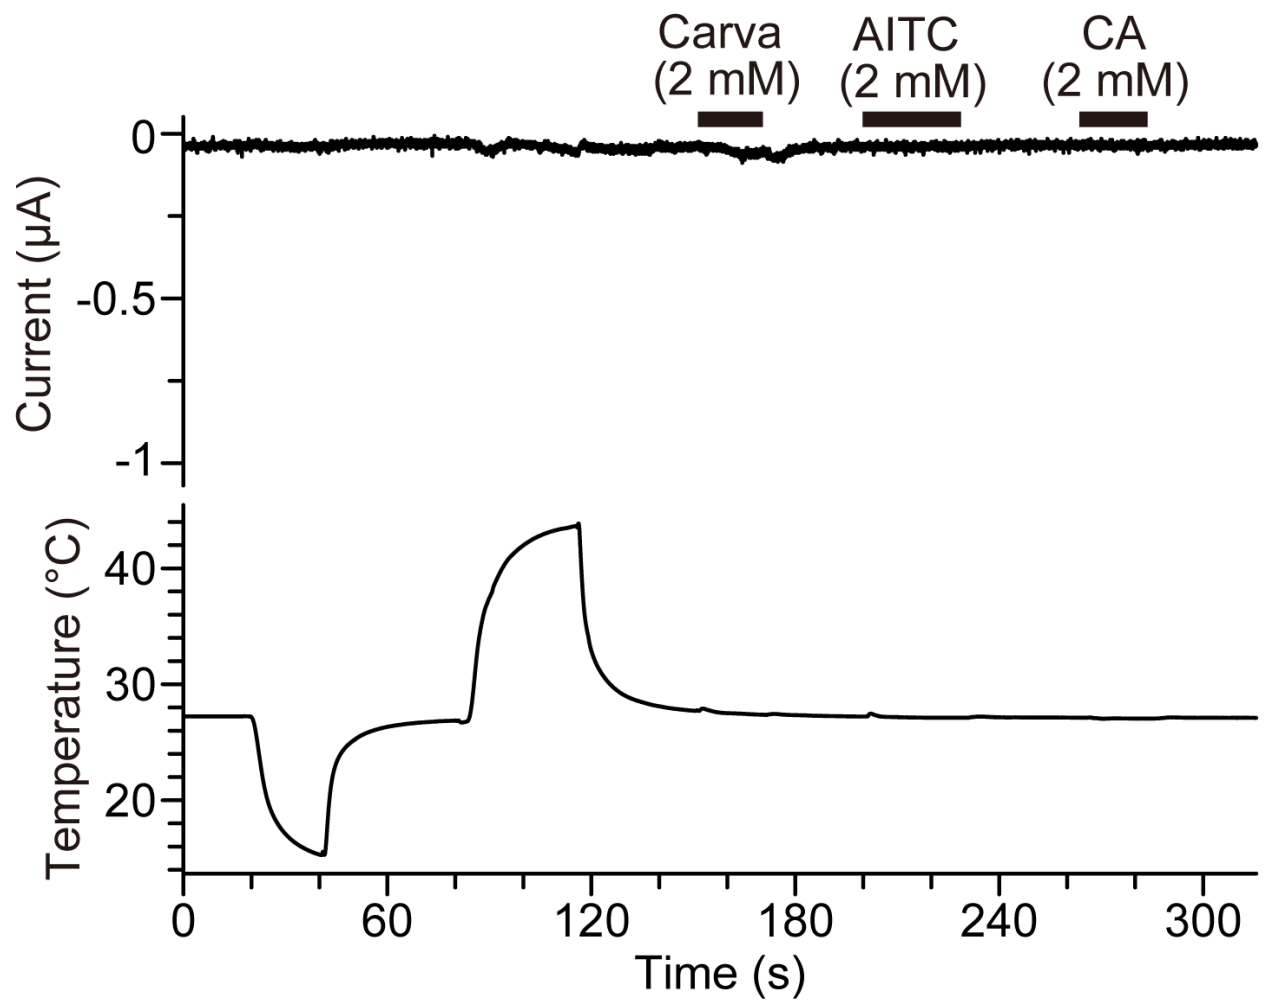

**Supplementary Fig S3. Electrophysiological properties of *Pp*TRPA basal.**

Representative current (upper) and temperature (lower) traces against cold, heat, carvacrol (Carva), AITC, and CA applications in *X. laevis* oocytes expressing *Pp*TRPA basal (n=3).

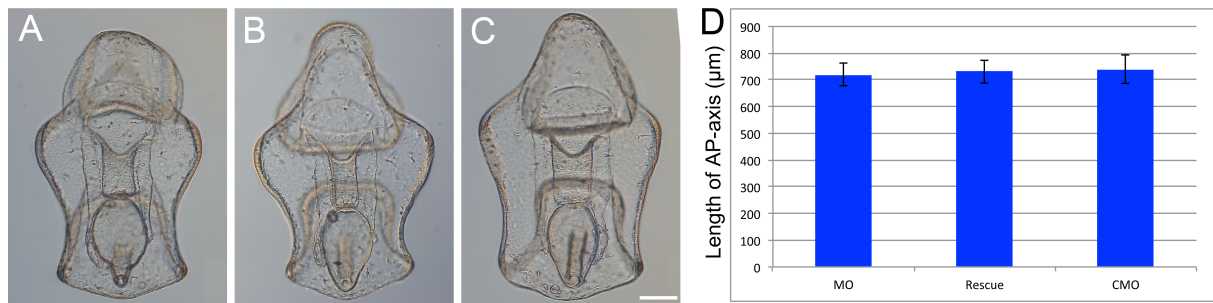

**Supplementary Fig. S4. Morphology of (A) a *PpTRPA1* MO, (B) a rescued and (C) a CMO larva.** Photographs were taken 4 days after fertilization. Scale bar, 100 μm. **(D)** Comparison of larval sizes among **(A)**, **(B)** and **(C)**. Graph shows the mean with s. d. of larval length along the anterior-posterior axis. Ten to twenty larvae were tested in three independent batches.

## Supplementary movie legends

**Supplementary movie 1.** Thermotaxis assay in a 20 °C (right) to 25 °C (left) temperature gradient with normal bipinnaria larvae.

**Supplementary movie 2.** Thermotaxis assay without a thermal gradient with normal bipinnaria larvae.

**Supplementary movie 3.** Thermotaxis assay in a 26 °C (right) to 36 °C (left) temperature gradient with normal bipinnaria larvae.

**Supplementary movie 4.** Thermotaxis assay in a 20 °C (right) to 25 °C (left) temperature gradient with RR-treated bipinnaria larvae.

**Supplementary movie 5.** Thermotaxis assay in a 20 °C (right) to 25 °C (left) temperature gradient with a *PpTRPA1*-morphant.

**Supplementary movie 6.** Thermotaxis assay in a 20 °C (right) to 25 °C (left) temperature gradient with rescued larvae.
